# Supplementary material
Source: PubMed Central journal article supplement (PMC1074683)

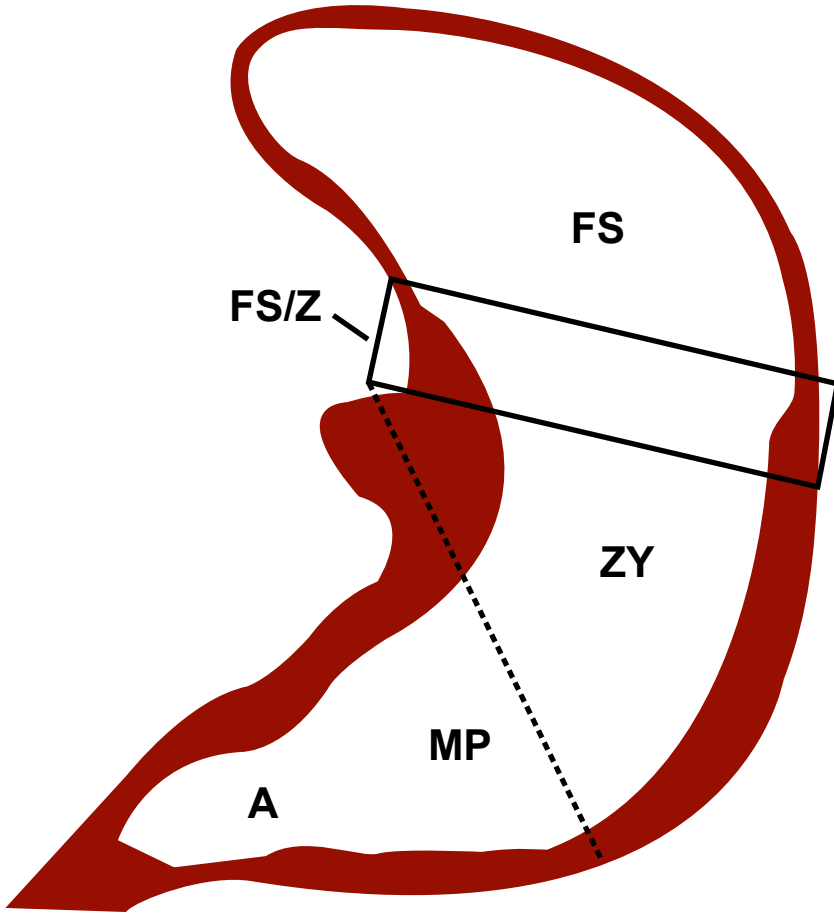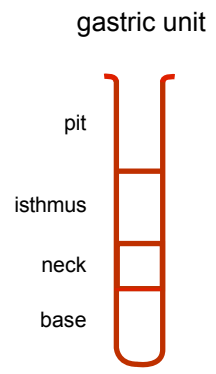

Supplement: pnas_102_14_5186__1.pdf [file pnas_102_14_5186__1.pdf]
